# Supplementary material
Source: publisher figshare collection journal article supplement (https://acs.figshare.com/ndownloader/files/31208608)
Supplement: Supplementary file 1 [file 31208608]

## Supporting Information

### **Designing of Efficient Bifunctional ORR/OER Pt Single Atom Catalysts Based on O-terminated MXenes by First Principles Calculations**

*Dongxiao Kan<sup>a,b</sup>, Dashuai Wang<sup>a</sup>, Yingjie Cheng<sup>a</sup>, Ruqian Lian<sup>a</sup>, Bo Sun<sup>a</sup>, Kaiyun Chen<sup>b</sup>,  
Wangtu Huo<sup>b</sup>, Yizhan Wang<sup>a</sup>, Gang Chen<sup>a</sup>, Yingjin Wei<sup>\*a</sup>*

<sup>a</sup>Key Laboratory of Physics and Technology for Advanced Batteries (Ministry of Education), Jilin Engineering Laboratory of New Energy Materials and Technology, College of Physics, Jilin University, Changchun 130012, P.R. China.

<sup>b</sup>Northwest Institute for Non-Ferrous Metal Research

\*yjwei@jlu.edu.cn; 86-431-85155126

## S-1 Figures

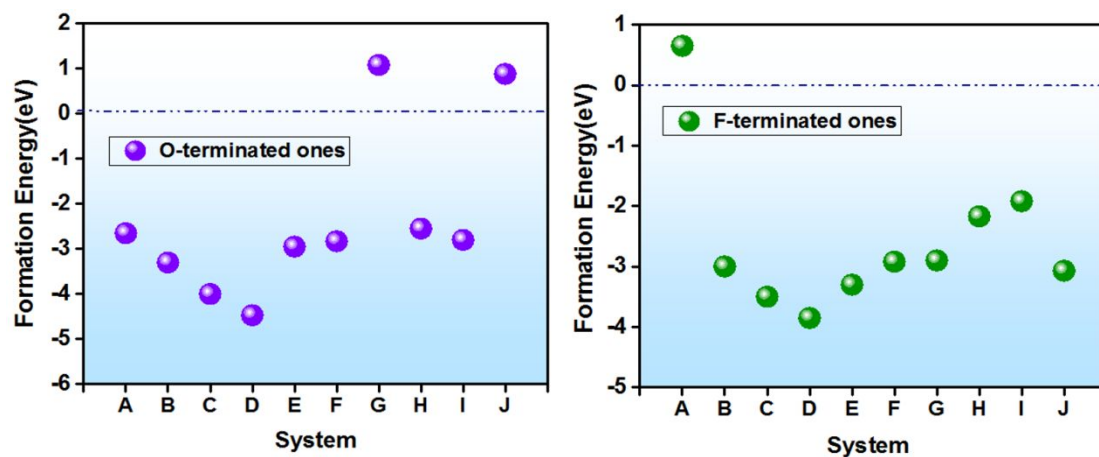

**Figure S1** The formation energy of Pt single atom on  $M_2CT_2-V_T-Pt$  ( $T=O$ ; F). A-J represent  $Sc_2CT_2-V_T-Pt$ ,  $Ti_2CT_2-V_T-Pt$ ,  $Zr_2CT_2-V_T-Pt$ ,  $Hf_2CT_2-V_T-Pt$ ,  $V_2CT_2-V_T-Pt$ ,  $Nb_2CT_2-V_T-Pt$ ,  $Ta_2CT_2-V_T-Pt$ ,  $Cr_2CT_2-V_T-Pt$ ,  $Mo_2CT_2-V_T-Pt$ ,  $W_2CT_2-V_T-Pt$ , respectively.

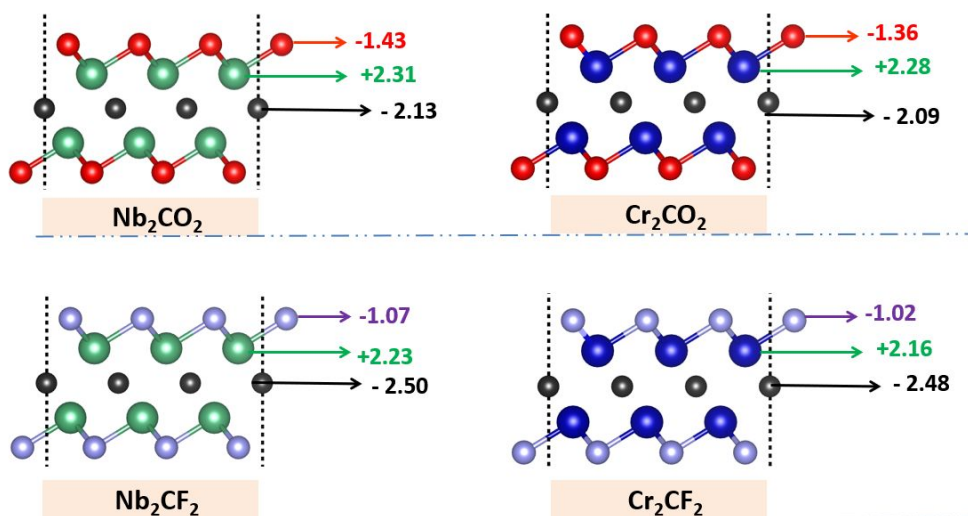

**Figure S2** Bader charge populations of  $Nb_2CO_2$ ,  $Cr_2CO_2$ ,  $Nb_2CF_2$  and  $Cr_2CF_2$ .

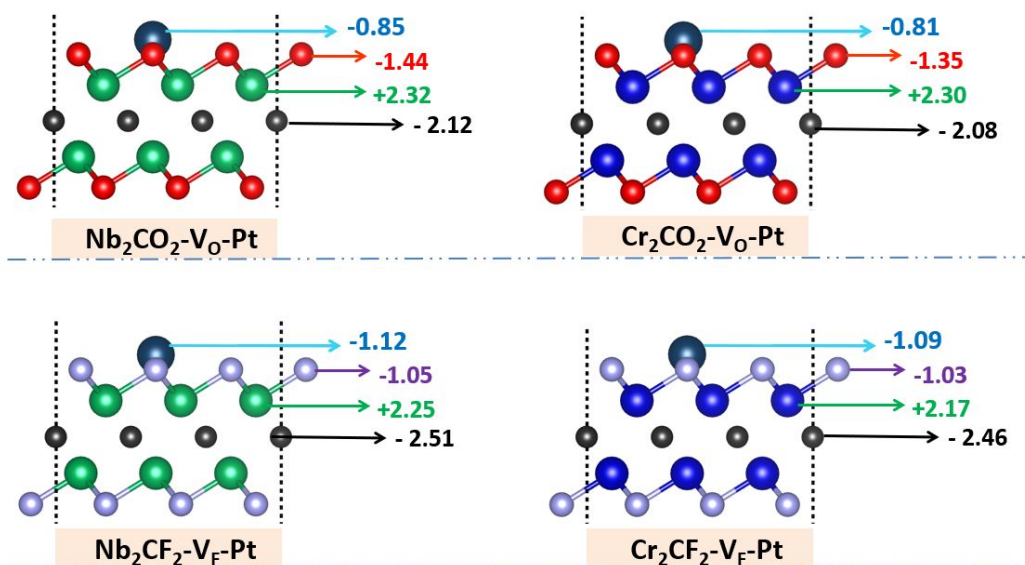

**Figure S3** Bader charge populations of Nb<sub>2</sub>CO<sub>2</sub>-V<sub>O</sub>-Pt, Cr<sub>2</sub>CO<sub>2</sub>-V<sub>O</sub>-Pt, Nb<sub>2</sub>CF<sub>2</sub>-V<sub>F</sub>-Pt and Cr<sub>2</sub>CF<sub>2</sub>-V<sub>F</sub>-Pt.

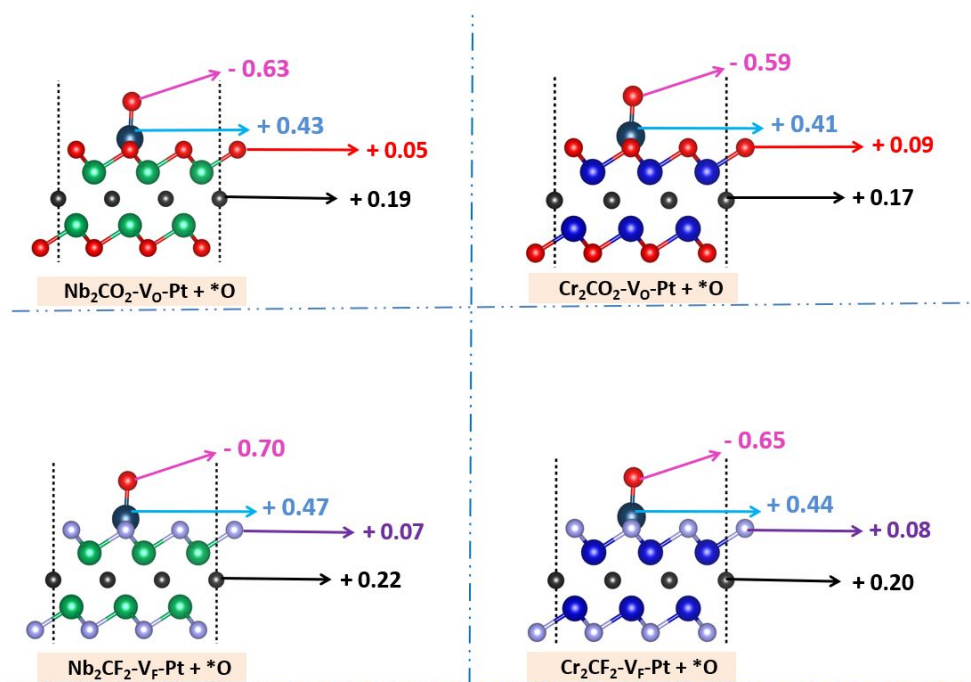

**Figure S4** Bader charge populations of the O-atom adsorbed on Nb<sub>2</sub>CO<sub>2</sub>-V<sub>O</sub>-Pt, Cr<sub>2</sub>CO<sub>2</sub>-V<sub>O</sub>-Pt, Nb<sub>2</sub>CF<sub>2</sub>-V<sub>F</sub>-Pt and Cr<sub>2</sub>CF<sub>2</sub>-V<sub>F</sub>-Pt.

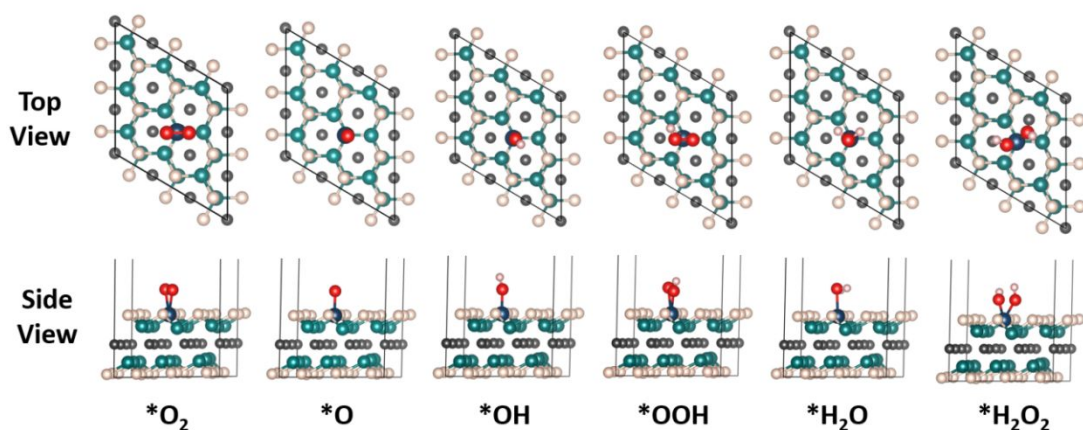

**Figure S5** The geometric structures of  $O_2$ , O-atom, OH, OOH,  $H_2O$  and  $H_2O_2$  adsorbed on the surface of Pt SACs.

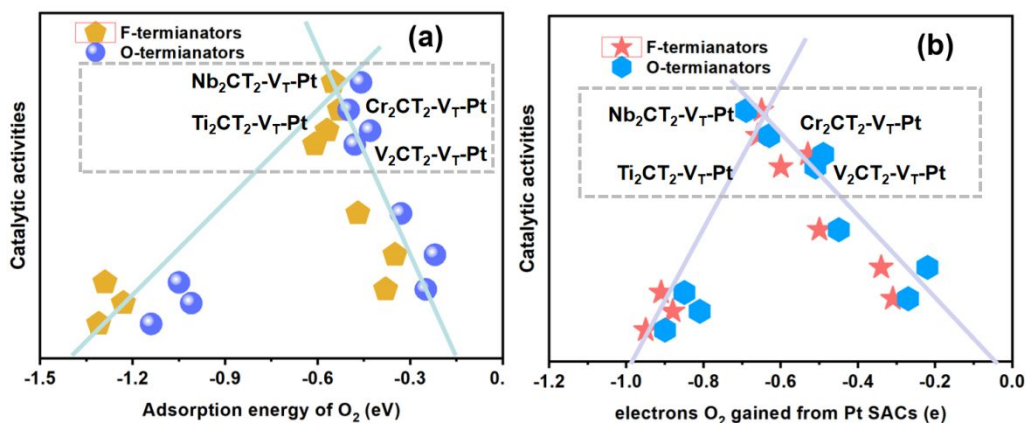

**Figure S6** The relationship between catalytic activities and  $O_2$  binding strength to Pt SACs, including (a) the adsorption energy of  $O_2$  and (b) the electrons that  $O_2$  gained.

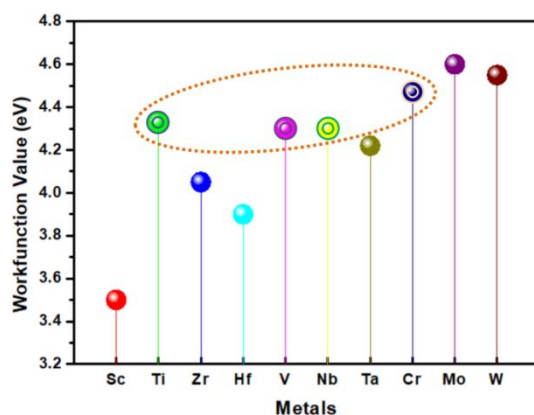

**Figure S7** The work function values of the submetals in  $M_2CT_2-V_T-Pt$  ( $M = Sc, Ti, Zr, Hf, V, Nb, Ta, Cr, Mo, W$ ;  $T = O, F$ ).

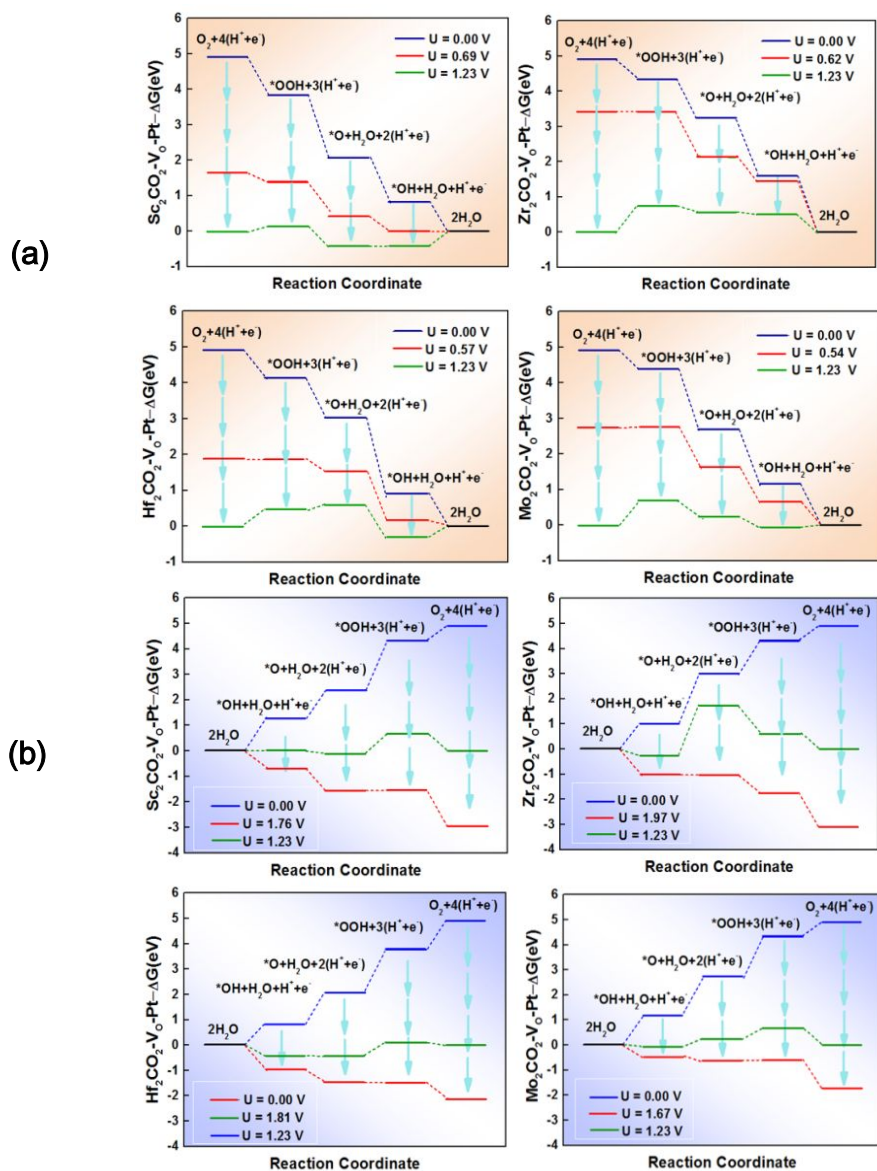

**Figure S8** (a-b, respectively) The free energy diagram of the O-terminated Pt SACs ( $\text{Hf}_2\text{CO}_2\text{-V}_0\text{-Pt}$ ,  $\text{Zr}_2\text{CO}_2\text{-V}_0\text{-Pt}$ ,  $\text{Mo}_2\text{CO}_2\text{-V}_0\text{-Pt}$ ) for the elementary ORR and OER steps, where the submetals are Zr, Hf, Ta, W and Mo, respectively.



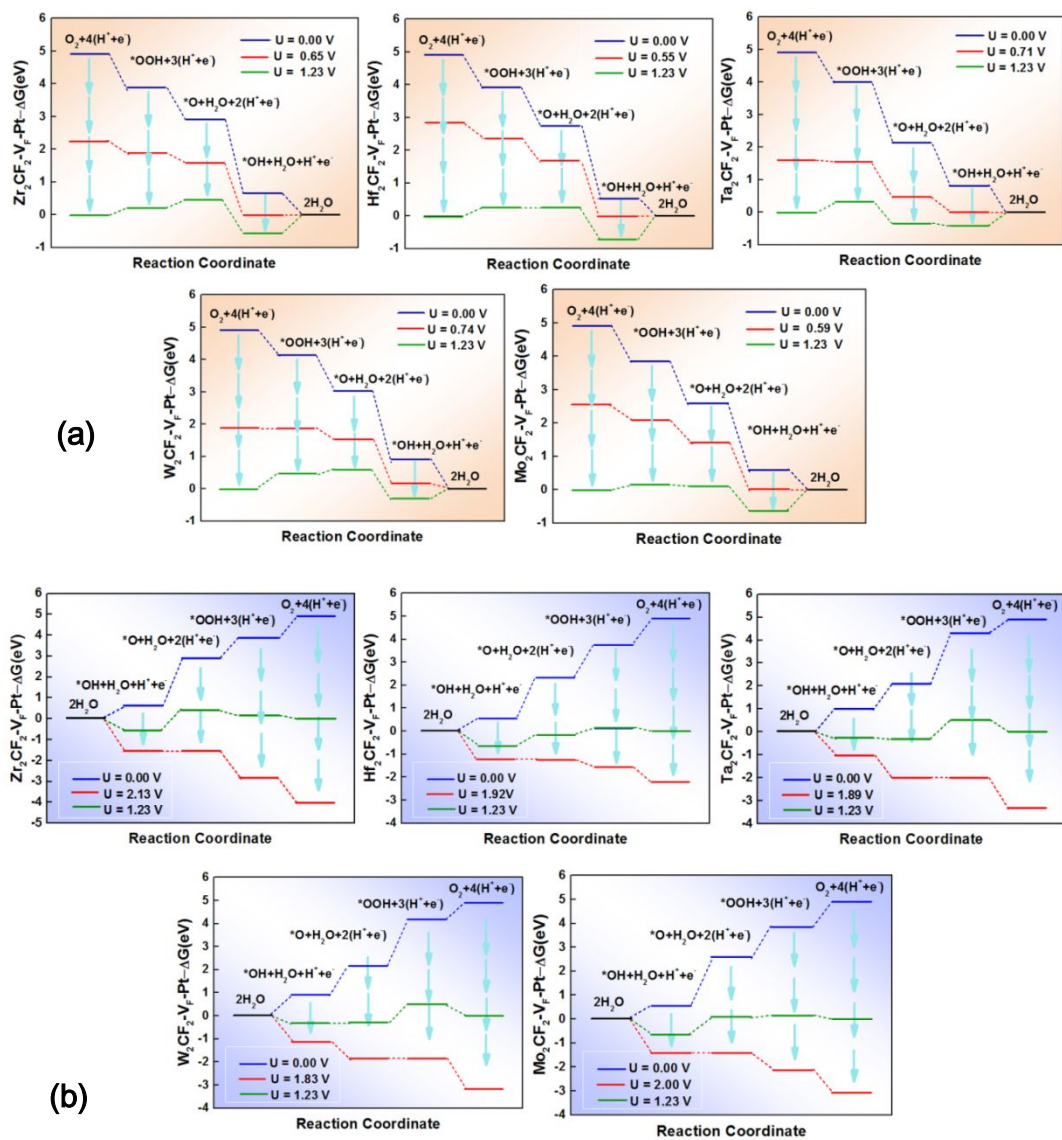

**Figure S9** (a-b, respectively) The free energy diagram of F-terminated Pt SACs ( $\text{Zr}_2\text{CF}_2\text{-V}_\text{F}\text{-Pt}$ ,  $\text{Hf}_2\text{CF}_2\text{-V}_\text{F}\text{-Pt}$ ,  $\text{Ta}_2\text{CF}_2\text{-V}_\text{F}\text{-Pt}$ ,  $\text{W}_2\text{CF}_2\text{-V}_\text{F}\text{-Pt}$ ,  $\text{Mo}_2\text{CF}_2\text{-V}_\text{F}\text{-Pt}$ ) for the elementary ORR and OER steps.

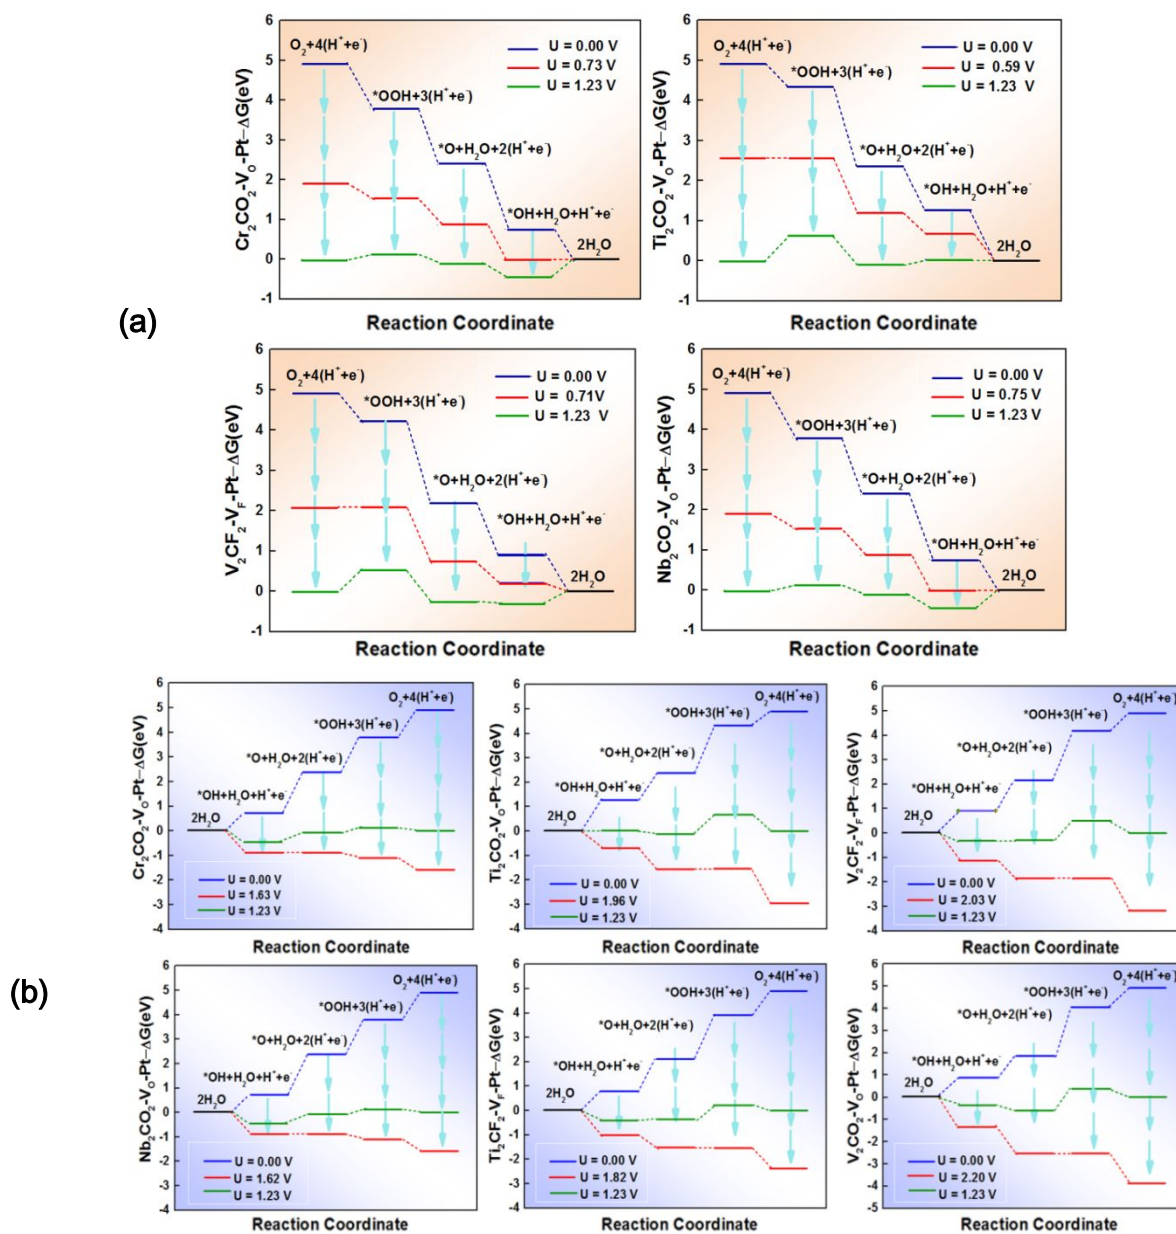

**Figure S10** The free energy diagram of (a)  $\text{Cr}_2\text{CO}_2\text{-V}_0\text{-Pt}$ ,  $\text{Ti}_2\text{CO}_2\text{-V}_0\text{-Pt}$ ,  $\text{V}_2\text{CF}_2\text{-V}_\text{F}\text{-Pt}$ ,  $\text{Nb}_2\text{CO}_2\text{-V}_0\text{-Pt}$  for the elementary ORR steps, and (b)  $\text{Cr}_2\text{CO}_2\text{-V}_0\text{-Pt}$ ,  $\text{Ti}_2\text{CO}_2\text{-V}_0\text{-Pt}$ ,  $\text{V}_2\text{CF}_2\text{-V}_\text{F}\text{-Pt}$ ,  $\text{Nb}_2\text{CO}_2\text{-V}_0\text{-Pt}$ ,  $\text{Ti}_2\text{CF}_2\text{-V}_\text{F}\text{-Pt}$ ,  $\text{V}_2\text{CO}_2\text{-V}_0\text{-Pt}$  for the elementary OER steps.

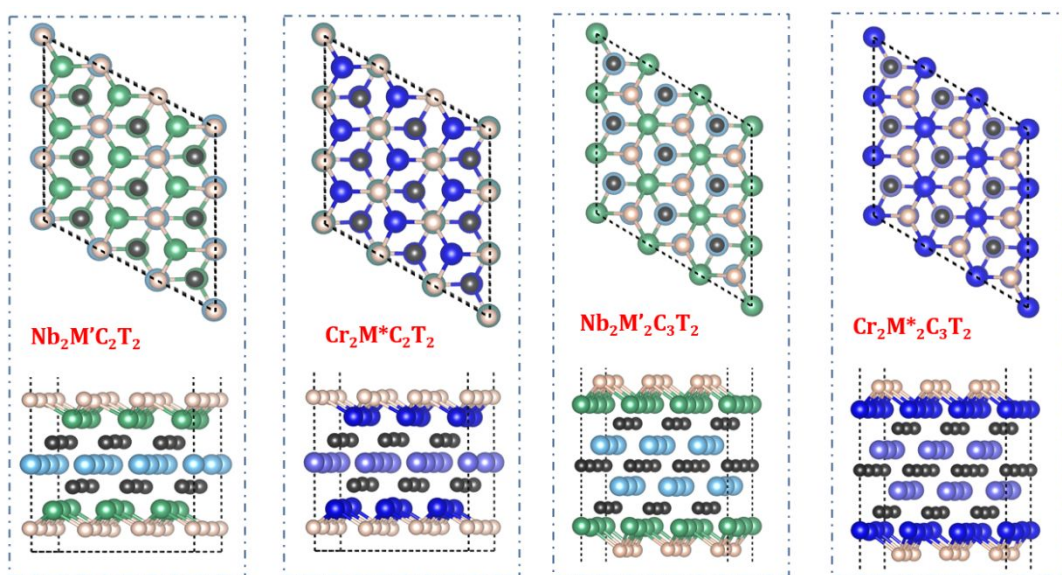

**Figure S11** The geometric structures of the selected bimetal MXenes ( $\text{Cr}_2\text{M}^*\text{C}_2\text{T}_2$ ,  $\text{Nb}_2\text{M}'\text{C}_2\text{T}_2$ ,  $\text{Nb}_2\text{M}'_2\text{C}_3\text{T}_2$ ,  $\text{Cr}_2\text{M}^*\text{C}_3\text{T}_2$ ).

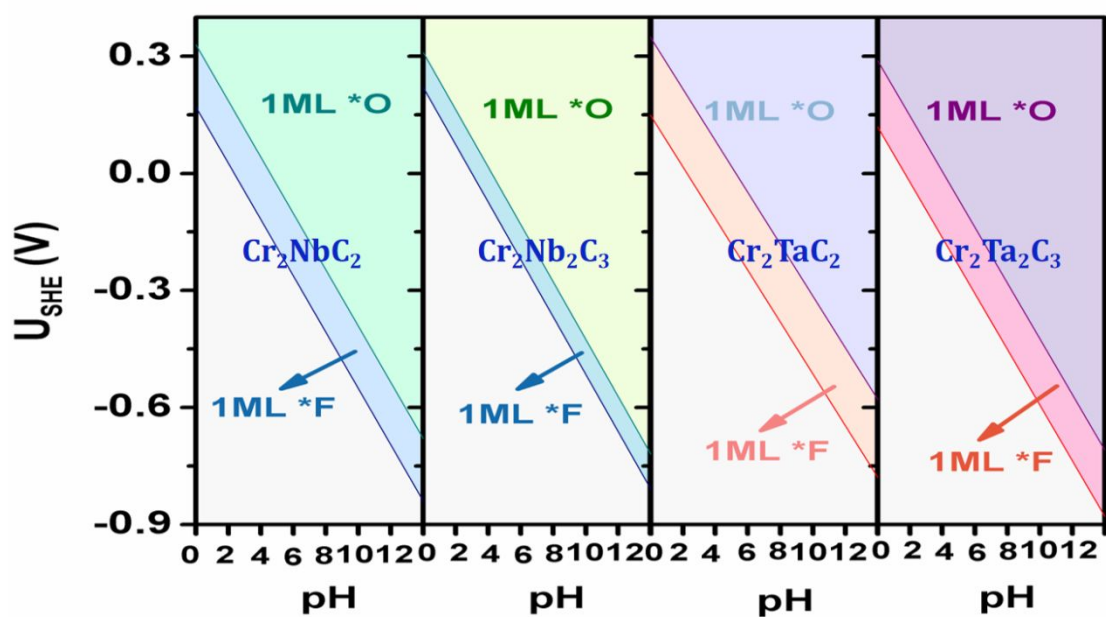

**Figure S12** Surface Pourbaix diagrams of  $\text{Cr}_2\text{NbC}_2$ ,  $\text{Cr}_2\text{Nb}_2\text{C}_3$ ,  $\text{Cr}_2\text{TaC}_2$  and  $\text{Cr}_2\text{Ta}_2\text{C}_3$  with different functional groups.



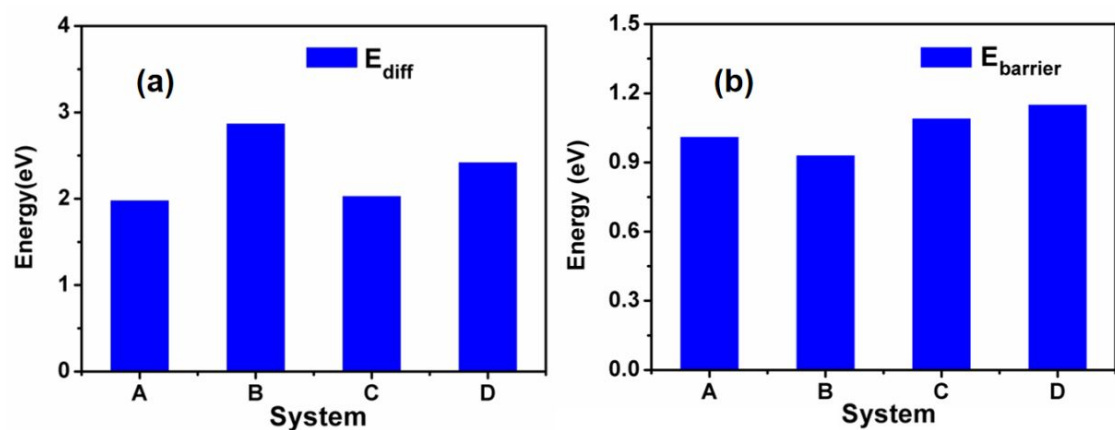

**Figure S13** (a) The diffusion energy and (b) the energy barrier of Pt single atom on the Cr-based MXenes, A-D are  $\text{Cr}_2\text{NbC}_2\text{O}_2\text{-V}_\text{O}\text{-Pt}$ ,  $\text{Cr}_2\text{Nb}_2\text{C}_3\text{O}_2\text{-V}_\text{O}\text{-Pt}$ ,  $\text{Cr}_2\text{Ta}_2\text{C}_3\text{O}_2\text{-V}_\text{O}\text{-Pt}$  and  $\text{Cr}_2\text{TaC}_2\text{O}_2\text{-V}_\text{O}\text{-Pt}$ , respectively.

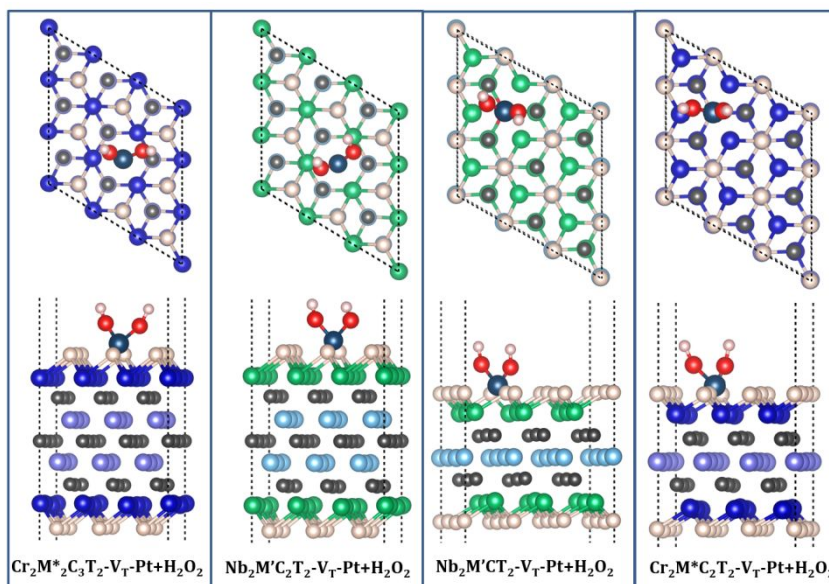

**Figure S14** Geometric structures of  $\text{H}_2\text{O}_2$  adsorbed on the surface of the bimetal Pt SACs ( $\text{Cr}_2\text{M}^*\text{C}_3\text{T}_2\text{-V}_\text{T}\text{-Pt}$ ,  $\text{Nb}_2\text{M}'\text{C}_2\text{T}_2\text{-V}_\text{T}\text{-Pt}$ ,  $\text{NbM}'\text{C}_2\text{T}_2\text{-V}_\text{T}\text{-Pt}$ ,  $\text{Cr}_2\text{M}^*\text{C}_2\text{T}_2\text{-V}_\text{T}\text{-Pt}$ ).

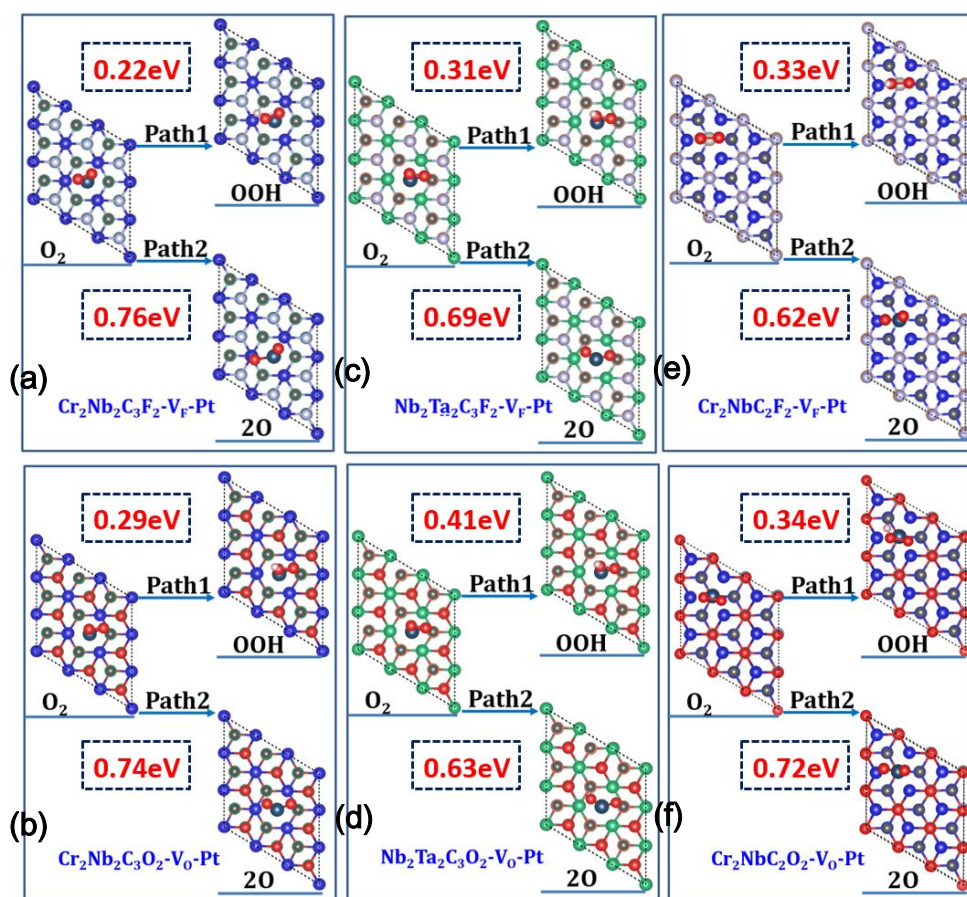

**Figure S15** The reaction competition of  $O_2$  hydrogenation (path 2) or dissociation (path 1) at the first step of ORR. a)-f) represent  $Cr_2Nb_2C_3F_2-V_F-Pt$ ,  $Cr_2Nb_2C_3O_2-V_O-Pt$ ,  $Nb_2Ta_2C_3F_2-V_F-Pt$ ,  $Nb_2Ta_2C_3O_2-V_O-Pt$ , and  $Cr_2NbC_2F_2-V_F-Pt$ ,  $Cr_2NbC_2O_2-V_O-Pt$ , respectively.

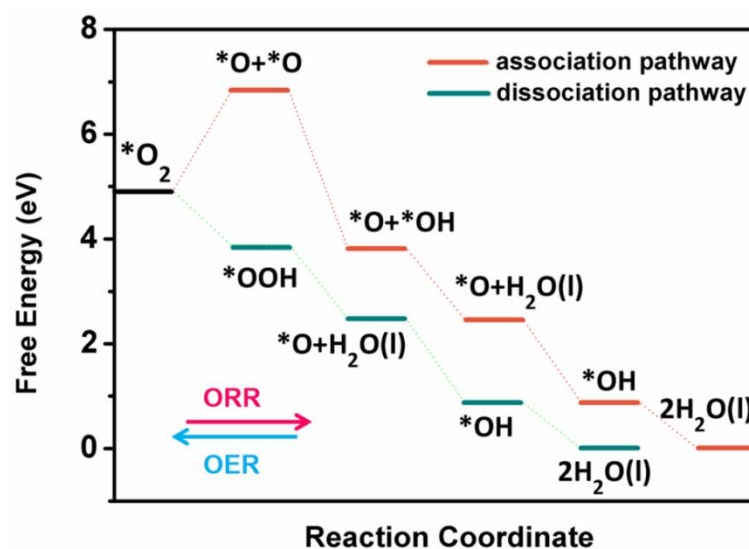

**Figure S16** The thermodynamic processes of ORR on  $Cr_2Nb_2C_3O_2-V_O-Pt$ , including association and dissociation pathways.

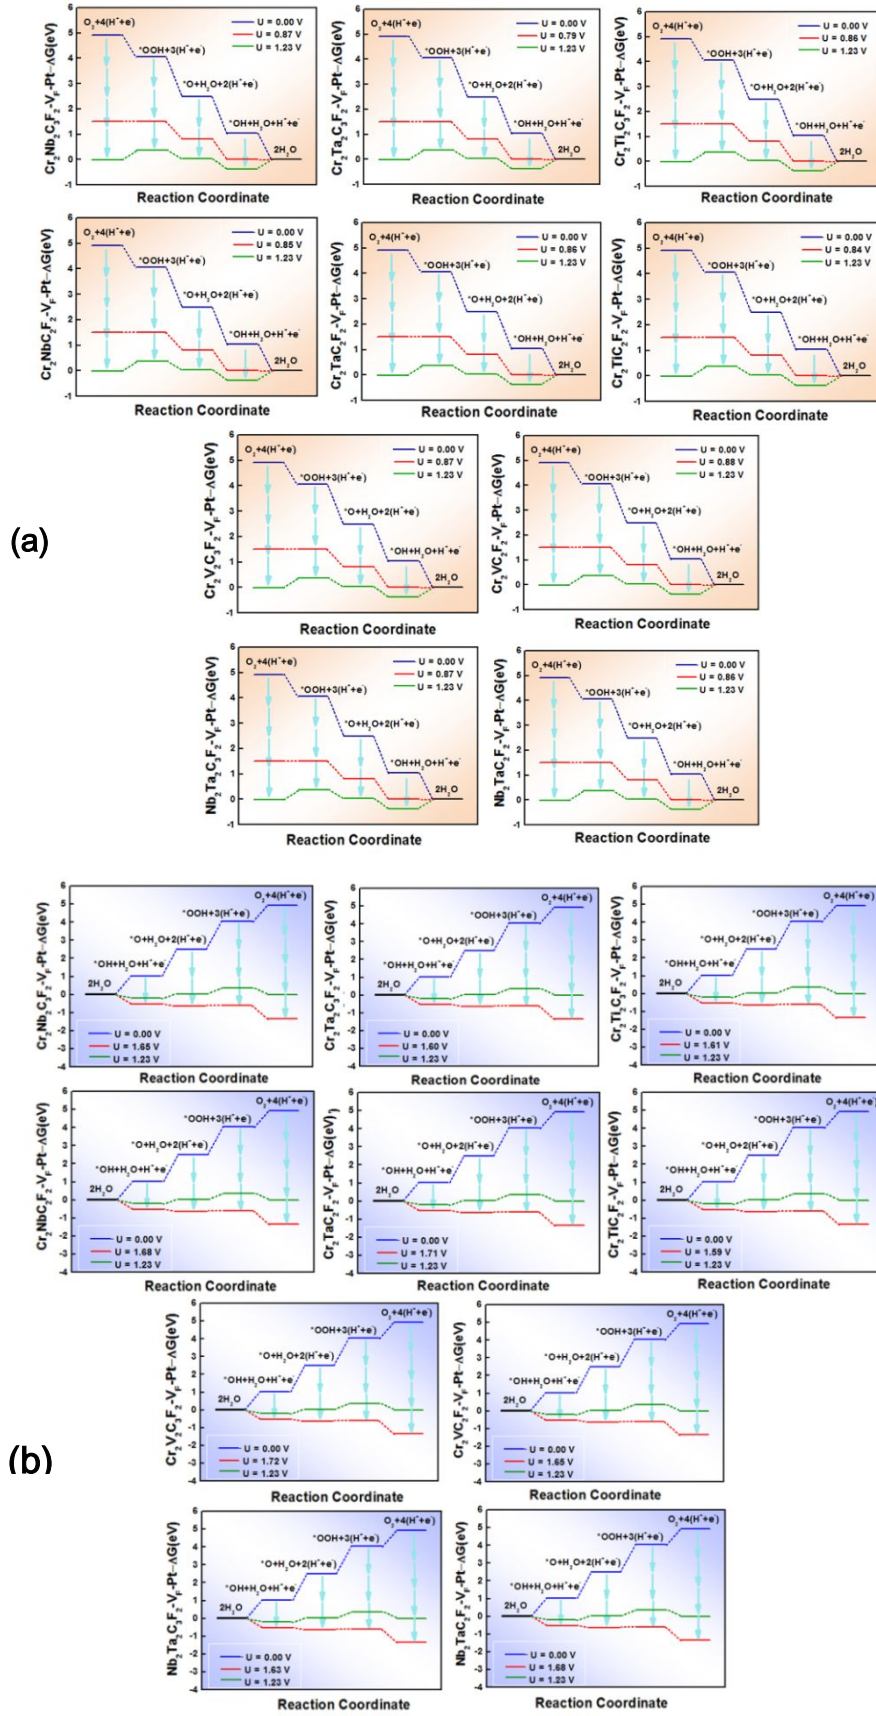

**Figure S17** (a-b, respectively) The free energy diagram of the F-terminated bimetal Pt

SACs ( $\text{Cr}_2\text{Nb}_2\text{C}_3\text{F}_2\text{-V}_\text{F}\text{-Pt}$ ,  $\text{Cr}_2\text{Ta}_2\text{C}_3\text{F}_2\text{-V}_\text{F}\text{-Pt}$ ,  $\text{Cr}_2\text{Ti}_2\text{C}_3\text{F}_2\text{-V}_\text{F}\text{-Pt}$ ,  $\text{Cr}_2\text{V}_2\text{C}_3\text{F}_2\text{-V}_\text{F}\text{-Pt}$ ,  $\text{Cr}_2\text{NbC}_2\text{F}_2\text{-V}_\text{F}\text{-Pt}$ ,  $\text{Cr}_2\text{TaC}_2\text{F}_2\text{-V}_\text{F}\text{-Pt}$ ,  $\text{Cr}_2\text{TiC}_2\text{F}_2\text{-V}_\text{F}\text{-Pt}$ ,  $\text{Cr}_2\text{VC}_2\text{F}_2\text{-V}_\text{F}\text{-Pt}$ ,  $\text{Nb}_2\text{Ta}_2\text{C}_3\text{F}_2\text{-V}_\text{F}\text{-Pt}$ ,  $\text{Nb}_2\text{TaC}_2\text{F}_2\text{-V}_\text{F}\text{-Pt}$ ) for the elementary ORR and OER steps.

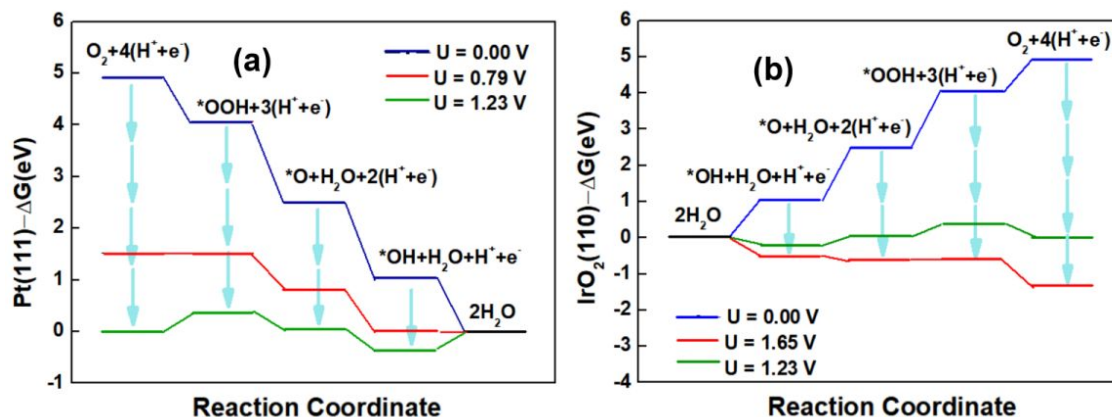

**Figure S18** The free energy diagram of (a) ORR on Pt (111) and (b) OER on  $\text{IrO}_2(110)$ .

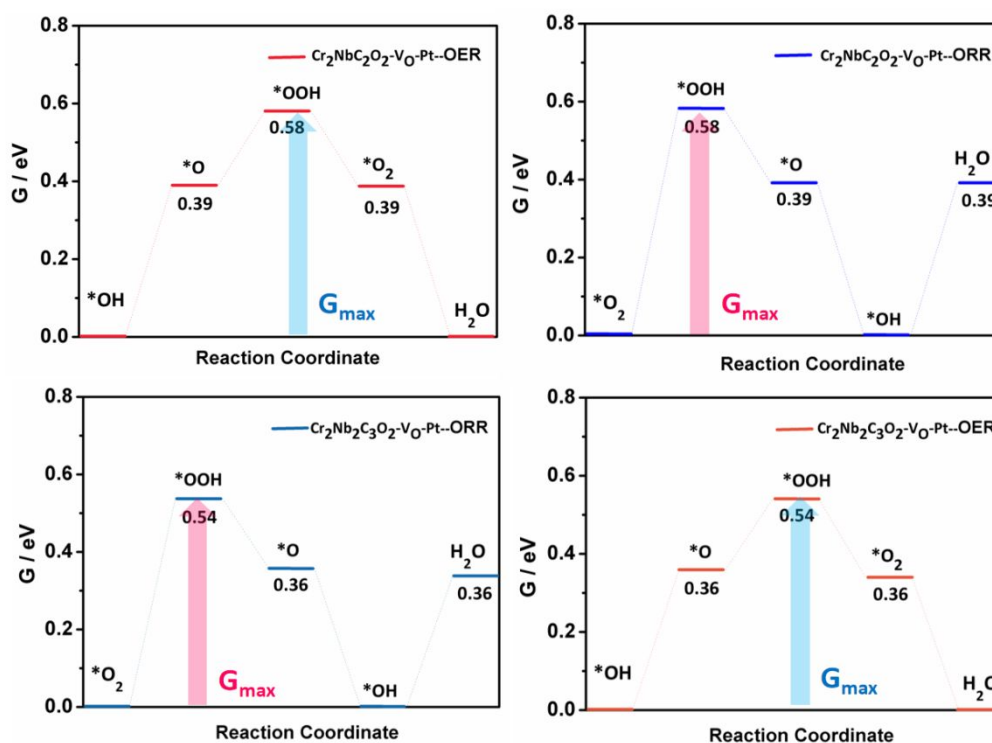

**Figure S19** The mechanistic description ( $G_{\text{max}}$ ) of ORR and OER on  $\text{Cr}_2\text{NbC}_2\text{O}_2\text{-V}_\text{O}\text{-Pt}$  and  $\text{Cr}_2\text{Nb}_2\text{C}_3\text{O}_2\text{-V}_\text{O}\text{-Pt}$ .



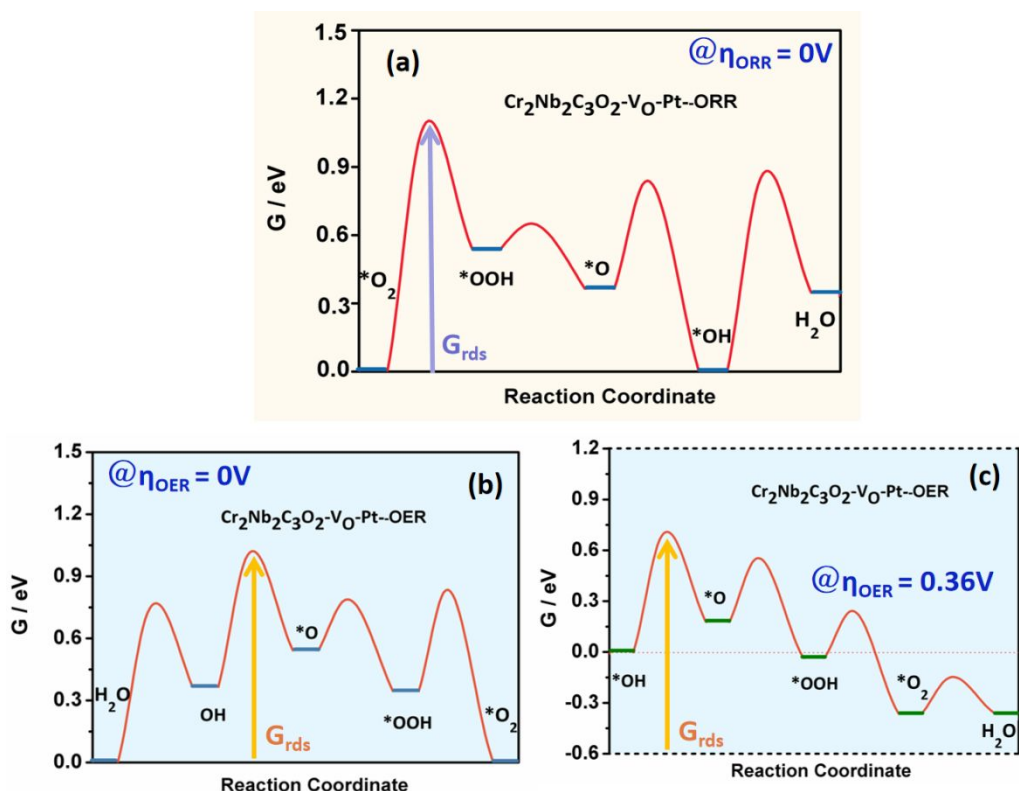

**Figure S20** The rate-determining step and the relative free energy on  $\text{Cr}_2\text{Nb}_2\text{C}_3\text{O}_2\text{-V}_\text{O}\text{-Pt}$  for (a) ORR at overpotential of 0 V, (b) OER at overpotential of 0 V and (c) OER at overpotential of 0.36 V.

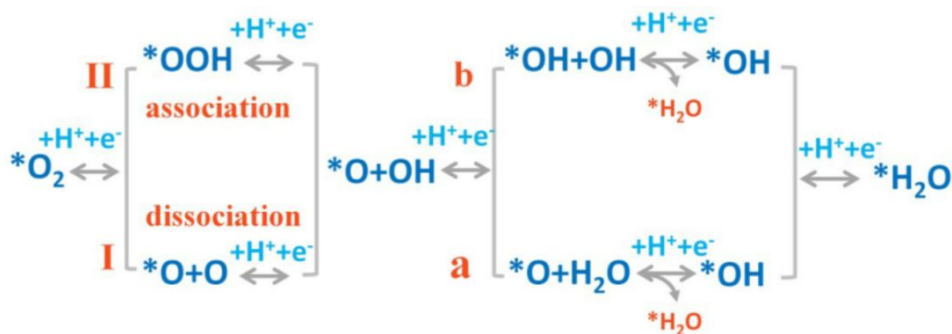

**Figure S21** The two possible reaction pathways as well as the proton-electron transfer process in the association mechanism.

## S-2 More calculation details

The overall ORR reaction in the acidic environment was written in Eq (1), like that occurs on the cathode of a fuel cell in discharge:

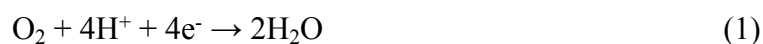

According to literatures, this ORR reaction proceeds via the 4-electron transfer pathways as shown in Eq 1a-1d:

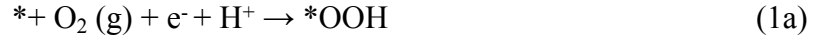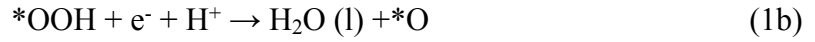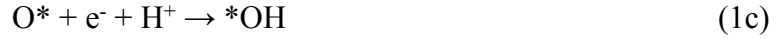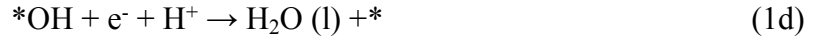

In which \* denotes an activity site on the catalyst, (l) and (g) represent liquid and gas phase, respectively.

The OER is the reverse reaction of ORR that described in Eq (2):

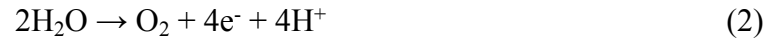

with the 4-electron transfer pathways given in Eq 2a-2d:

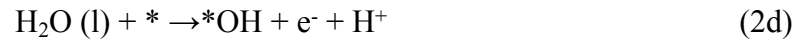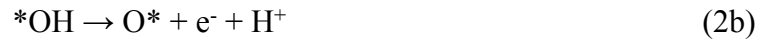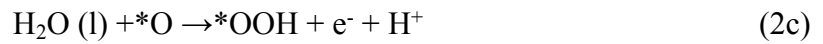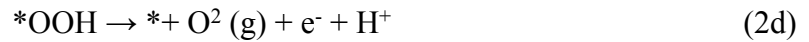

### S-3 The diffusion energy

To evaluate the clustering tendency of the adatoms, the cohesive energy of the corresponding bulk metal was considered. The diffusion energy ( $E_{\text{diff}}$ ) were defined as

$$E_{\text{diff}} = E_{\text{ads}} - E_{\text{coh}} \quad (3)$$

where  $E_{\text{ads}}$  and  $E_{\text{coh}}$  denotes the adsorption energy and cohesive energy of the corresponding transition-metal bulk per metal atom, respectively, where were defined as follows:

$$E_{\text{ads}} = -[E_{\text{Pt@MXenes}} - (E_{\text{MXenes}} + E_{\text{Pt}})] \quad (4)$$

where  $E_{\text{Pt@MXenes}}$  was the total energy of the MXene layer with Pt adatom attached,  $E_{\text{MXenes}}$  was the total energy of the bare MXene, and  $E_{\text{Pt}}$  was the energy of an isolated Pt atom,

$$E_{\text{coh}} = E_{\text{at}} - \frac{E_{\text{bulk}}}{N} \quad (5)$$

where  $E_{\text{at}}$  was the energy of the isolated metal atom in vacuum and  $E_{\text{bulk}}$  was the energy of the bulk unit cell containing N atoms.

### S-4 The Pourbaix diagrams of O and F terminators

To further realize their stability in experiment and acidic ORR/OER environment, the

Pourbaix diagrams of O and F terminators on the selected Cr-based bi-metal MXenes were studied referring to previous literature<sup>1-2</sup>. The corresponding data are summarized in Figure S12, where the  $U_{\text{SHE}}$  of all O and F terminators are positive on these MXenes. However, the  $U_{\text{SHE}}$  values of O are more positive than those of F, which indicates the higher stability of O-terminated MXenes in experiment and acidic ORR/OER environment.

### S-5 Association and dissociation pathways

To consider the  $\text{H}^+$  and  $\text{e}^-$  species on the reaction path in a standard procedure, the depicts free-energy diagrams including association pathway and dissociation pathway at zero overpotential is supplemented (taken  $\text{Cr}_2\text{Nb}_2\text{C}_3\text{O}_2\text{-V}_\text{O}\text{-Pt}$  as example). As shown in Figure S16, the distinction of the free energy in the association path and the dissociation path is before the formation of  $\text{*O}$ . The potential determining step of ORR is  $\text{*O}_2 + \text{H}^+ + \text{e}^- \rightarrow \text{*OOH}$  for the associative path and  $\text{*O}_2 \rightarrow \text{*O} + \text{*O}$  for the dissociative path, with an overpotential of 0.36 V and 1.75 V, respectively. For the OER process, the potential determining step is  $\text{*OH} + \text{H}_2\text{O}_{(\text{l})} \rightarrow \text{*O} + \text{H}_2\text{O}_{(\text{l})} + \text{H}^+ + \text{e}^-$  for the association path and  $\text{*O} + \text{*O} \rightarrow \text{O}_2$  for the dissociative path, with an overpotential of 0.37 V and 3.12 V, respectively. Hence, from the thermodynamic aspect, the association mechanism is also more favorable than the dissociation mechanism for its smaller ORR and OER overpotentials.

### S-6 The mechanistic description

To further confirm the activity trend, the free-energy changes among the mechanistic description ( $G_{\text{max}}$ ) are taken into account. As shown in Figure S19, the  $G_{\text{max}}$  that the transition from  $\text{*O}$  adsorbate to  $\text{*OOH}$  are 0.54 eV and 0.58 eV on  $\text{Cr}_2\text{NbC}_2\text{O}_2\text{-V}_\text{O}\text{-Pt}$  and  $\text{Cr}_2\text{Nb}_2\text{C}_3\text{O}_2\text{-V}_\text{O}\text{-Pt}$ , respectively, both of which are much lower than that of ORR on Pt(111) and OER on  $\text{IrO}_2$  (110) (0.75 eV and 0.92 eV, respectively). This again demonstrates the bi-functional catalysis activity of  $\text{Cr}_2\text{NbC}_2\text{O}_2\text{-V}_\text{O}\text{-Pt}$  and  $\text{Cr}_2\text{Nb}_2\text{C}_3\text{O}_2\text{-V}_\text{O}\text{-Pt}$ .

The rate-determining reaction step (RDS) of ORR and OER on  $\text{Cr}_2\text{Nb}_2\text{C}_3\text{O}_2\text{-V}_\text{O}\text{-Pt}$  were also studied to clarify the practical activity based on the full free-energy diagram. As shown in Figure S20, the RDS of ORR was formed when  $\text{O}_2$  turned to  $\text{*OOH}$  at 0V overpotential. While both the RDS of OER was the step of  $\text{*O}$  formation at the overpotential of 0V or 0.36 V. This result is consistent with the discussion in the main text.

## References

1. Zhan, C.; Sun, W.; Xie, Y.; Jiang, D.; Kent, P. R. C. Computational Discovery and Design of MXenes for Energy Applications: Status, Successes, and Opportunities. *ACS Appl. Mater. Interfaces*, **2019**, 11, 24885–24905
2. Gao, G.; O'Mullane, A. P.; Du, A. 2D MXenes: A New Family of Promising Catalysts for the Hydrogen Evolution Reaction. *ACS Catal.* **2017**, 7, 494–500
